# Supplementary material for: Technical Note: Testing the Connection Between Hillslope Scale Runoff Fluctuations and Streamflow Hydrographs at the Outlet of Large River Basins
Source: Copernicus journal article supplement (doi:10.5194/hess-2023-187), 2023-08-03
Supplement: Supplementary file 1 [file hess-2023-187-supplement.pdf]

Supporting Information for

# **Technical Note: Testing the Connection Between Hillslope Scale Runoff Fluctuations and Streamflow Hydrographs at the Outlet of Large River Basins**

Ricardo Mantilla<sup>1</sup>, Morgan Fonley<sup>2</sup>, and Nicolás Velasquez<sup>3</sup>

<sup>1</sup>Department of Civil Engineering, University of Manitoba, Winnipeg, MB, Canada

<sup>2</sup>Alma College, Alma, MI, USA

<sup>3</sup>Iowa Flood Center, University of Iowa, Iowa City, IA, USA

*Correspondence to:* Ricardo Mantilla ([ricardo.mantilla@umanitoba.ca](mailto:ricardo.mantilla@umanitoba.ca))

## **Contents of this file**

Figures S1 to S3

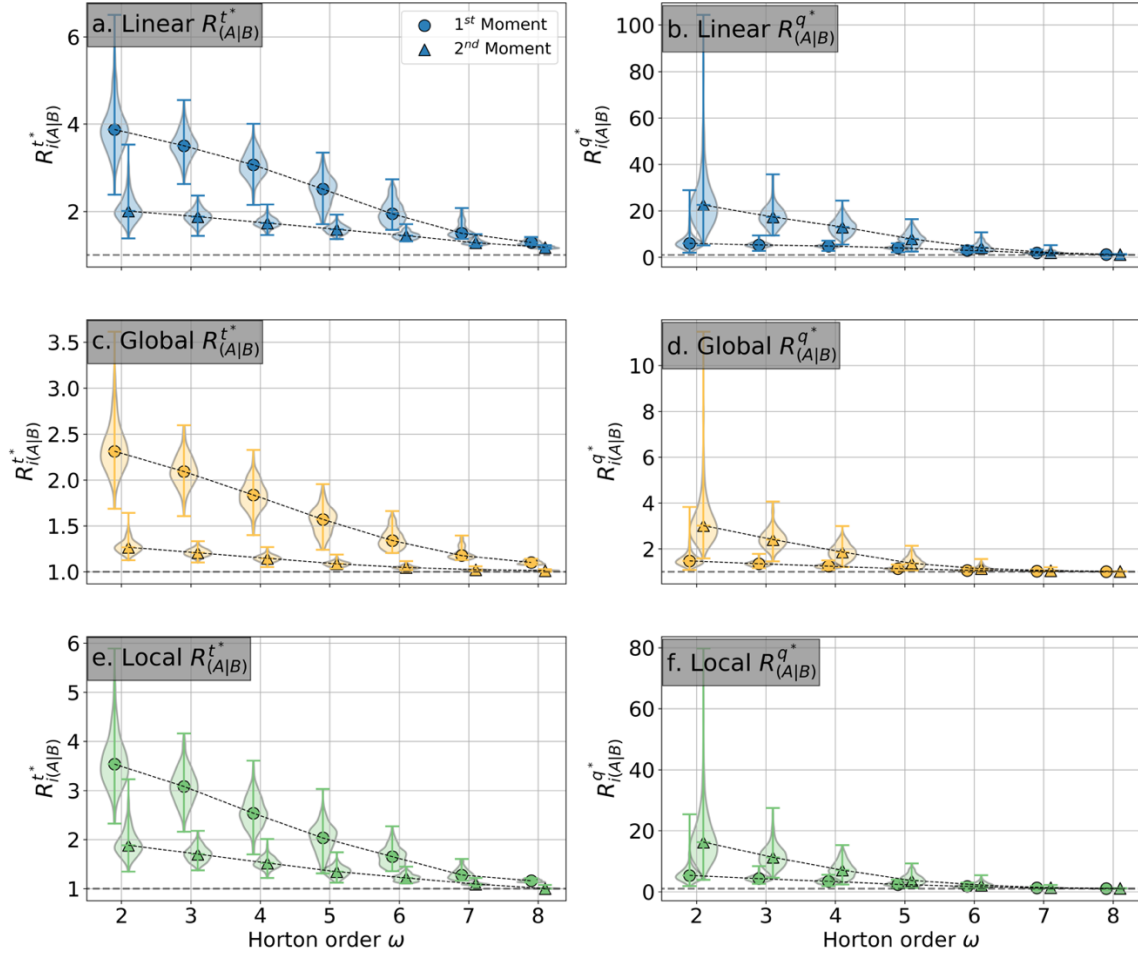

**Figure S1. Convergence of hydrographs to a common hydrograph for all links in the river network. The Violin plot represent the distribution of moment ratios for time ( $t^*$ ) on the left panels and discharge ( $q^*$ ) on the right panels for hydrographs at the outlet of catchments of different Horton Order in the basin.**

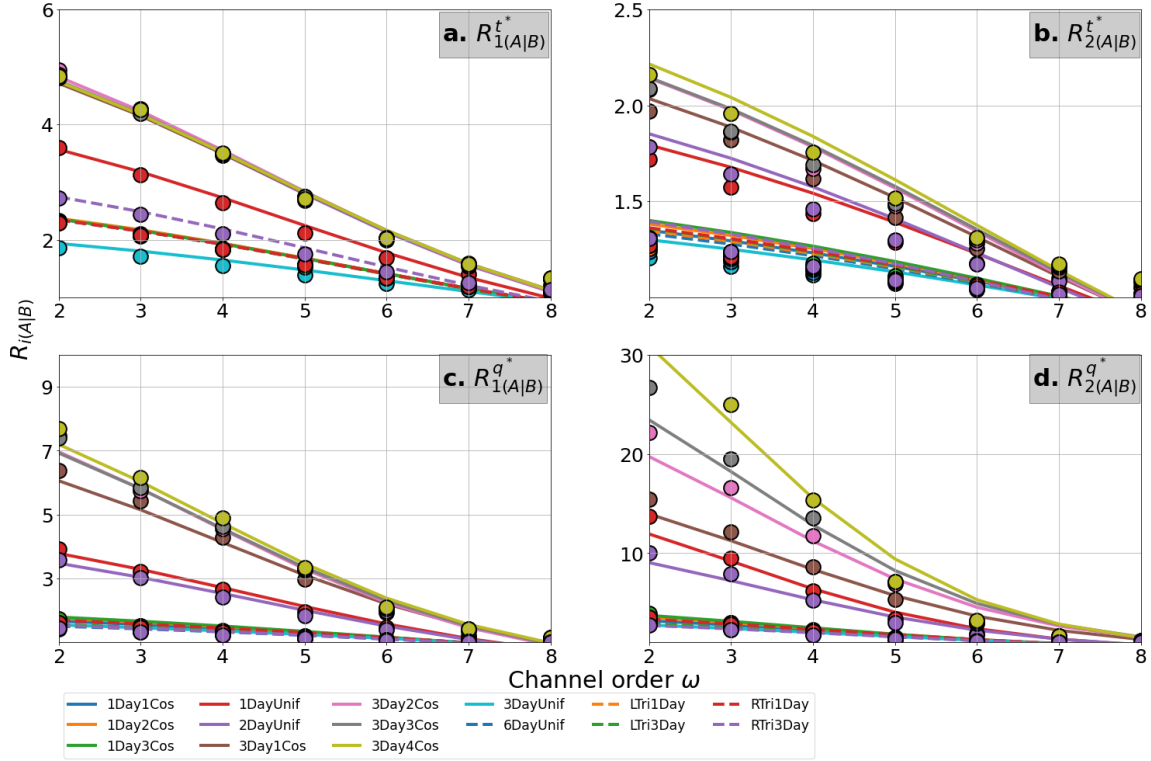

Figure S2. Convergence of moments to the Dirac case using global self-similar non-linear routing.

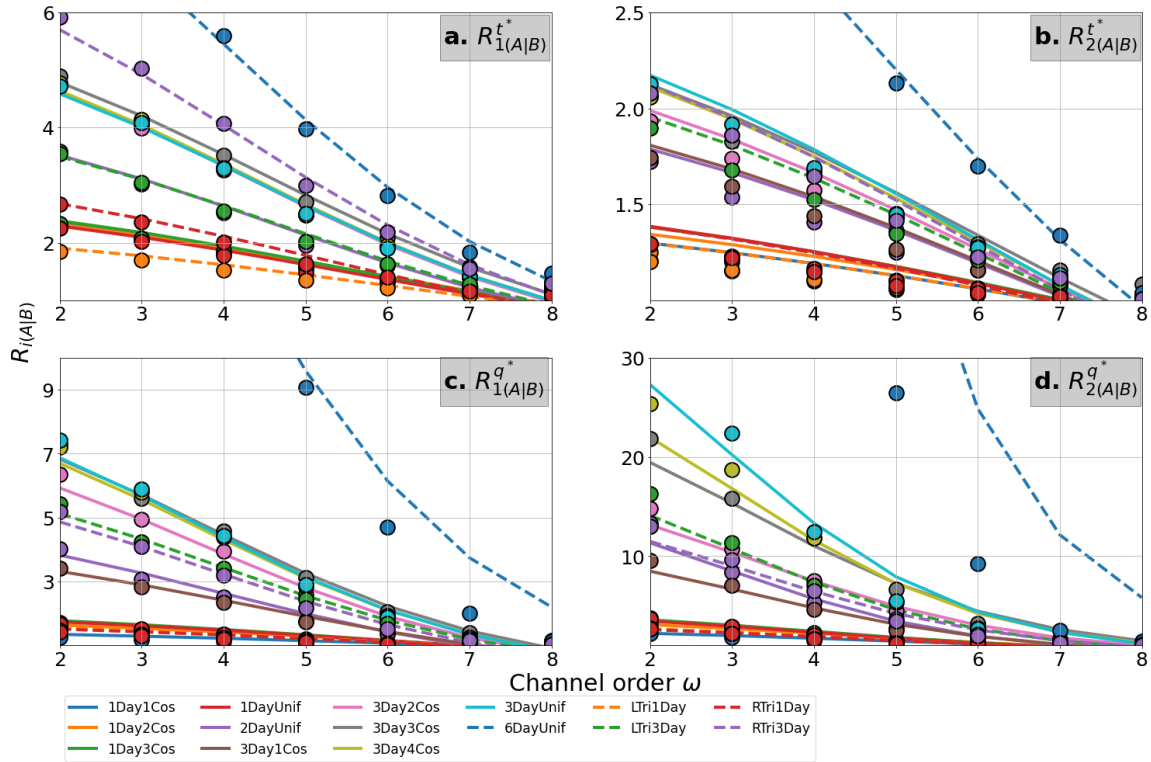

Figure S3. Convergence of moments to the Dirac case using local self-similar non-linear routing.
