# Supplementary material for: Technical Note: Testing the Connection Between Hillslope Scale Runoff Fluctuations and Streamflow Hydrographs at the Outlet of Large River Basins
Source: Copernicus journal article supplement (doi:10.5194/hess-2023-187), 2023-08-03
Supplement: Supplementary file [file hess-2023-187-AC3-supplement.pdf]

According to Beven 1979

$$\frac{\partial Q}{\partial t} + C \frac{\partial Q}{\partial x} = C q_{\text{eff}}^{(x)}$$

where  $C$  is celerity (speed of propagation of disturbances)

Our equation derived from continuity and  $V = V_0 \left(\frac{q}{q_{\text{ref}}}\right)^{\lambda_1} \left(\frac{A}{A_{\text{ref}}}\right)^{\lambda_2}$  where  $A$  is upstream basin area

$$\frac{dQ}{dt} = \frac{V_0 \left(\frac{q}{q_{\text{ref}}}\right)^{\lambda_1} \left(\frac{A}{A_{\text{ref}}}\right)^{\lambda_2}}{(1 - \lambda_1) l} \left( q_{\text{int}} - Q + \sum Q_{\text{up}} \right)$$

Note that our equation integrates over the reach length ( $\sim 500\text{m}$ ), but can be rewritten as

$$\frac{dQ}{dt} = \frac{V_0 \left(\frac{q}{q_{\text{ref}}}\right)^{\lambda_1} \left(\frac{A}{A_{\text{ref}}}\right)^{\lambda_2}}{(1 - \lambda_1)} \left( \frac{[q_{\text{int}} + \sum Q_{\text{up}}] - Q}{l} \right)$$

the term in the parenthesis can be interpreted as  $\frac{\partial Q}{\partial x}$

$$\Rightarrow C = \frac{V}{1 - \lambda_1}$$

\* in our study  $\lambda_1 = 0.3$  therefore  $C = 1.43 V$
